# Supplementary material
Source: PubMed Central journal article supplement (PMC283611)
Supplement: pnas_100_24_14445__14.pdf [file pnas_100_24_14445__14.pdf]

## Supporting Text

### An Allosteric Model for $G_{s\alpha}$ Function

Consider a two-state equilibrium between a basal state of G protein (stabilized by GDP (G) (which binds  $G_{\beta\gamma}$ ) and an active state of G protein (stabilized by GTP) ( $G^*$ ) [which binds adenylyl cyclase (AC)] that is coupled to nucleotide exchange (see Fig. 2), where  $L_{GDP}$  is the equilibrium constant for the reaction in the GDP-bound state, and  $L_{GTP}$  is that in the GTP-bound state. The apparent equilibrium binding constant (dissociation constant) for interaction of AC or  $G_{\beta\gamma}$  with the GTP- or GDP-bound states of  $G_{s\alpha}$  will depend on the allosteric constants in the following manner:

$$K_{app,GTP}^{AC} = K_{AC} \left[ 1 + \frac{1}{L_{GTP}} \right]$$

$$K_{app,GDP}^{AC} = K_{AC} \left[ 1 + \frac{1}{L_{GDP}} \right]$$

$$K_{app,GTP}^{\beta\gamma} = K_{\beta\gamma} [1 + L_{GTP}]$$

$$K_{app,GDP}^{\beta\gamma} = K_{\beta\gamma} [1 + L_{GDP}] ,$$

where  $K_{AC}$  is the intrinsic binding constant of adenylyl cyclase to the  $G^*$  state, and  $K_{\beta\gamma}$  is the intrinsic binding constant of  $G_{\beta\gamma}$  to the G state. To understand the effect of mutations that alter the allosteric binding constants, we plot the apparent binding constants for AC and  $G_{\beta\gamma}$  for all values of  $L$  in Fig. 7.

Consider the effect of mutants that cause equal left or right shifts of the allosteric constants  $L_{GDP}$  and  $L_{GTP}$  on the binding affinities of adenylyl cyclase or  $G_{\beta\gamma}$ . Shifts to the right will cause the ratio of affinities of adenylyl cyclase for the GTP $\gamma$ S and GDP states (the nucleotide sensitivity) to decrease relative to WT but will cause the same ratio for  $G_{\beta\gamma}$  to increase relative to WT. Shifts of  $L_{GTP}$  and  $L_{GDP}$  to the left will cause exactly the opposite effect. In contrast, mutations that perturb the absolute affinities for cyclase or

$G_{\beta\gamma}$  need not (and generally will not) display a reciprocal effect on the nucleotide sensitivities.
