# Supplementary material
Source: PubMed Central journal article supplement (PMC283611)

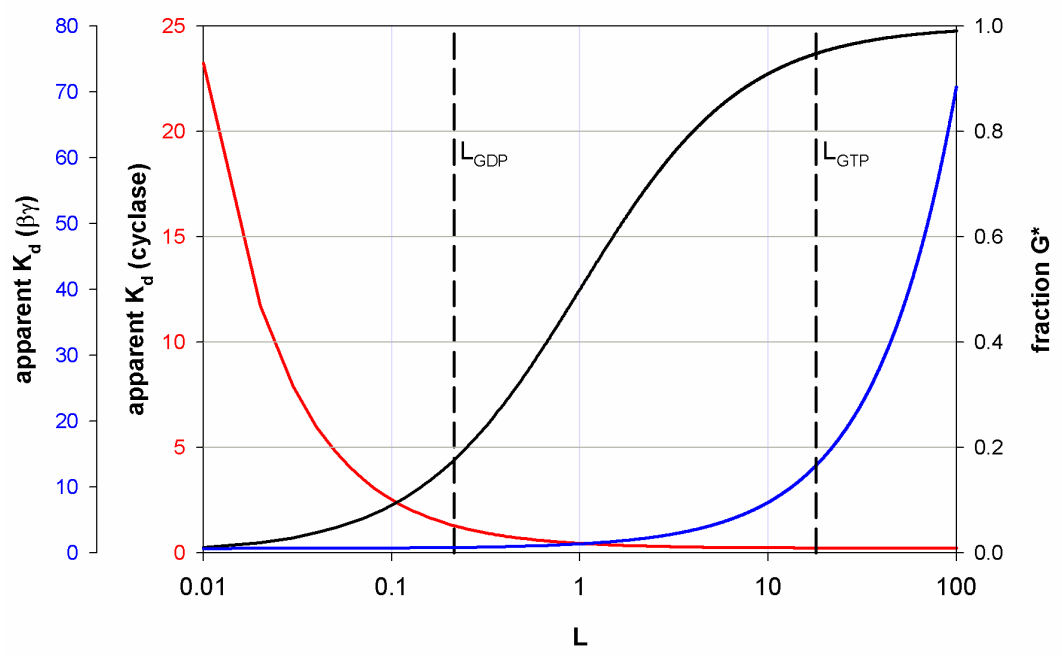

Supplement: pnas_100_24_14445__2.pdf [file pnas_100_24_14445__2.pdf]
